# Supplementary material for: Relative contributions of pre-pandemic factors and intra-pandemic activities to differential COVID-19 risk among migrant and non-migrant populations in the Netherlands: lessons for future pandemic preparedness
Source: Springer Nature journal article supplement (doi:10.1186/s12939-023-01936-0), 2023-07-04
Supplement: MOESM1 [file 25572888]

Appendix 1. Overview of datasets used for study analyses.

| Dataset | Participant description                                                                                                  | Total Number | Period                          | Main analyses                                                                                                                                                                                                                                                                                                                                                                                                                                                                                                                                                                                        | Sensitivity analyses                                                                                                                                                                                                                                                                                                                                                                                                                                                                                                                                                        |
|---------|--------------------------------------------------------------------------------------------------------------------------|--------------|---------------------------------|------------------------------------------------------------------------------------------------------------------------------------------------------------------------------------------------------------------------------------------------------------------------------------------------------------------------------------------------------------------------------------------------------------------------------------------------------------------------------------------------------------------------------------------------------------------------------------------------------|-----------------------------------------------------------------------------------------------------------------------------------------------------------------------------------------------------------------------------------------------------------------------------------------------------------------------------------------------------------------------------------------------------------------------------------------------------------------------------------------------------------------------------------------------------------------------------|
| 1       | participants from the <i>main HELIUS cohort</i> that had successfully merged with GGD Amsterdam PCR test data            | 8985         | 2011- 2015                      | <ul style="list-style-type: none"> <li>• Tabulation of baseline characteristics</li> <li>• Calculation of age and sex adjusted proportions of SARS-CoV-2 positive PCR tests.</li> <li>• Calculation of prevalence ratios (PRs) via Poisson regression models</li> <li>• Calculation of population attributable fractions (PAFs)</li> <li>• Adjustments for age and sex as baseline models</li> <li>• Adjustments of sociodemographic and medical factors in models</li> <li>• Adjustments of lifestyle factors in models</li> <li>• Reporting relative changes in PAFs after adjustments.</li> </ul> | <ul style="list-style-type: none"> <li>• Comparison of baseline characteristics with total HELIUS population</li> <li>• Comparison of baseline characteristics with analysis other datasets</li> </ul>                                                                                                                                                                                                                                                                                                                                                                      |
| 2       | participants from the <i>COVID-19 serological substudy</i> that had successfully merged with GGD Amsterdam PCR test data | 714          | November 2020 to September 2021 | <ul style="list-style-type: none"> <li>• Tabulation of baseline characteristics</li> <li>• Calculation of prevalence ratios (PRs) via Poisson regression models</li> <li>• Calculation of population attributable fractions (PAFs)</li> <li>• Adjustments for age and sex as baseline models</li> <li>• Adjustments of sociodemographic and medical factors in models</li> <li>• Adjustments of intra-pandemic risk aggravating activities in models</li> <li>• Reporting relative changes in PAFs after adjustments</li> </ul>                                                                      | <ul style="list-style-type: none"> <li>• Comparison of baseline characteristics with total HELIUS population</li> <li>• Comparison of baseline characteristics with analysis other datasets</li> <li>• Checking that changes in PAFs in this dataset are consistently larger after correcting for sociodemographic and medical factors than after correcting for intra-pandemic COVID-19 aggravating activities in the base models.</li> <li>• Comparing proportions of SARS-CoV-2 antibody testing (past infections) versus PCR testing (current infections)</li> </ul>    |
| 3       | participants from the <i>COVID-19 online substudy</i> that had successfully merged with GGD Amsterdam PCR test data      | 553          | June 2020 to October 2020       | <ul style="list-style-type: none"> <li>• Tabulation of baseline characteristics</li> <li>• Calculation of prevalence ratios (PRs) via Poisson regression models</li> <li>• Calculation of population attributable fractions (PAFs)</li> <li>• Adjustments for age and sex as baseline models</li> <li>• Adjustments of sociodemographic and medical factors in models</li> <li>• Adjustments of intra-pandemic risk mitigating activities in models</li> <li>• Reporting relative changes in PAFs after adjustments</li> </ul>                                                                       | <ul style="list-style-type: none"> <li>• Comparison of baseline characteristics with total HELIUS population</li> <li>• Comparison of baseline characteristics with analysis other datasets</li> <li>• Checking that changes in PAFs in this dataset are consistently larger after correcting for sociodemographic and medical factors than after correcting for intra-pandemic COVID-19 mitigating activities in the base models.</li> <li>• Checking that changes in PAFs after removing those vaccinated against COVID-19 and those with previous infections.</li> </ul> |
| 4       | participants from the <i>COVID-19 serological substudy</i> irrespective of PCR test data merging.                        | 2033         | November 2020 to September 2021 | <ul style="list-style-type: none"> <li>• None</li> </ul>                                                                                                                                                                                                                                                                                                                                                                                                                                                                                                                                             | <ul style="list-style-type: none"> <li>• main analyses based on SARS-CoV-2 PCR test data were replicated using SARS-CoV-2 antibody tests</li> </ul>                                                                                                                                                                                                                                                                                                                                                                                                                         |

**Appendix 2.** Associations between migration background and SARS-Cov-2 positive PCR test, adjusted for pre-pandemic socio-demographic and medical factors in the main dataset.

| Variable                                                            | Number per group (N) | Actual population prevalence in Amsterdam (%) | Model 1 PR (95% CI) | Model 1 PAF (%) | Model 2 PR (95% CI) | Model 2 PAF (%) | % Change in PAFs from Model 1 to 2 |
|---------------------------------------------------------------------|----------------------|-----------------------------------------------|---------------------|-----------------|---------------------|-----------------|------------------------------------|
| <b>Education and occupation (explanatory factor)</b>                |                      |                                               |                     |                 |                     |                 |                                    |
| Dutch origin                                                        | 2038                 | 43.83                                         | 1.00 (ref)          | ref             | 1.00 (ref)          | ref             | ref                                |
| South Asian Surinamese origin                                       | 1316                 | 3.65                                          | 1.95(1.68-2.27)     | 3.35            | 1.70(1.44-2.01)     | 2.49            | 25.67                              |
| African Surinamese origin                                           | 1605                 | 3.65                                          | 2.00(1.74-2.31)     | 3.52            | 1.74(1.49-2.04)     | 2.63            | 25.28                              |
| Ghanaian origin                                                     | 501                  | 1.49                                          | 1.83(1.49-2.23)     | 1.22            | 1.52(1.20-1.91)     | 0.77            | 36.89                              |
| Turkish origin                                                      | 1578                 | 5.08                                          | 2.55(2.23-2.93)     | 7.30            | 2.12(1.81-2.51)     | 5.38            | 26.30                              |
| Moroccan origin                                                     | 1557                 | 8.87                                          | 2.80(2.45-3.22)     | 13.77           | 2.40(2.05-2.82)     | 11.05           | 19.75                              |
| <b>Household size (explanatory factor)</b>                          |                      |                                               |                     |                 |                     |                 |                                    |
| Dutch origin                                                        | 2038                 | 43.83                                         | 1.00 (ref)          | ref             | 1.00 (ref)          | ref             | ref                                |
| South Asian Surinamese origin                                       | 1316                 | 3.65                                          | 1.95(1.68-2.27)     | 3.35            | 1.85(1.59-2.16)     | 3.01            | 10.15                              |
| African Surinamese origin                                           | 1605                 | 3.65                                          | 2.00(1.74-2.31)     | 3.52            | 1.95(1.69-2.26)     | 3.35            | 4.83                               |
| Ghanaian origin                                                     | 501                  | 1.49                                          | 1.83(1.49-2.23)     | 1.22            | 1.73(1.41-2.12)     | 1.07            | 12.30                              |
| Turkish origin                                                      | 1578                 | 5.08                                          | 2.55(2.23-2.93)     | 7.30            | 2.30(2.01-2.66)     | 6.19            | 15.21                              |
| Moroccan origin                                                     | 1557                 | 8.87                                          | 2.80(2.45-3.22)     | 13.77           | 2.49(2.16-2.88)     | 11.68           | 15.18                              |
| <b>Healthy literacy (explanatory factor)</b>                        |                      |                                               |                     |                 |                     |                 |                                    |
| Dutch origin                                                        | 2038                 | 43.83                                         | 1.00 (ref)          | ref             | 1.00 (ref)          | ref             | ref                                |
| South Asian Surinamese origin                                       | 1316                 | 3.65                                          | 1.95(1.68-2.27)     | 3.35            | 1.94(1.67-2.26)     | 3.32            | 0.90                               |
| African Surinamese origin                                           | 1605                 | 3.65                                          | 2.00(1.74-2.31)     | 3.52            | 2.01(1.74-2.32)     | 3.56            | 1.14                               |
| Ghanaian origin                                                     | 501                  | 1.49                                          | 1.83(1.49-2.23)     | 1.22            | 1.76(1.43-2.16)     | 1.12            | 8.20                               |
| Turkish origin                                                      | 1578                 | 5.08                                          | 2.55(2.23-2.93)     | 7.30            | 2.48(2.15-2.86)     | 6.99            | 4.25                               |
| Moroccan origin                                                     | 1557                 | 8.87                                          | 2.80(2.45-3.22)     | 13.77           | 2.73(2.37-3.13)     | 13.31           | 3.34                               |
| <b>History of underlying medical condition (explanatory factor)</b> |                      |                                               |                     |                 |                     |                 |                                    |
| Dutch origin                                                        | 2038                 | 43.83                                         | 1.00 (ref)          | ref             | 1.00 (ref)          | ref             | ref                                |
| South Asian Surinamese origin                                       | 1316                 | 3.65                                          | 1.95(1.68-2.27)     | 3.35            | 1.91(1.66-2.22)     | 3.21            | 0.90                               |
| African Surinamese origin                                           | 1605                 | 3.65                                          | 2.00(1.74-2.31)     | 3.52            | 1.95(1.68-2.25)     | 3.35            | 1.14                               |
| Ghanaian origin                                                     | 501                  | 1.49                                          | 1.83(1.49-2.23)     | 1.22            | 1.77(1.44-2.16)     | 1.13            | 8.20                               |

|                 |      |      |                 |       |                 |       |      |
|-----------------|------|------|-----------------|-------|-----------------|-------|------|
| Turkish origin  | 1578 | 5.08 | 2.55(2.23-2.93) | 7.30  | 2.48(2.15-2.86) | 6.99  | 4.25 |
| Moroccan origin | 1557 | 8.87 | 2.80(2.45-3.22) | 13.77 | 2.73(2.38-3.14) | 13.31 | 3.34 |

**Actual population prevalence in Amsterdam:** obtained from Statistics Netherlands as of 01 January 2021

**PR=** Prevalence ratio obtained from Poisson regression models with robust errors. Outcome variable = proportion with a SARS-CoV-2 positive PCR test (yes or not)

**PAF=**population attributable fraction calculated from actual prevalence in Amsterdam and prevalence ratios. Confidence intervals for the PAFs were not calculated because we used the actual/precise population figures of Amsterdam (as opposed to estimated prevalence which bear some uncertainty) *Mansournia MA, Altman DG. Population attributable fraction. BMJ 2018 Feb 22;360.*

**Model 1:** adjusted for age + sex

**Model 2:** Model 1 + each of the pre-pandemic social demographic and medical factors (education+ occupation+ household size + health literacy+ history of underlying factors)

**Appendix 3.** Associations between migration background and SARS-Cov-2 positive PCR test, adjusted for pre-pandemic lifestyle factors.

| Variable                                      | Number per group (N) | Actual population prevalence in Amsterdam (%) | Model 1 PR (95% CI) | Model 1 PAF (%) | Model 2 PR (95% CI) | Model 2 PAF (%) | % Change in PAFs from Model 1 to 2 |
|-----------------------------------------------|----------------------|-----------------------------------------------|---------------------|-----------------|---------------------|-----------------|------------------------------------|
| <b>Alcohol intake (explanatory factor)</b>    |                      |                                               |                     |                 |                     |                 |                                    |
| Dutch origin                                  | 2038                 | 43.83                                         | 1.00 (ref)          | ref             | 1.00 (ref)          | ref             | ref                                |
| South Asian Surinamese origin                 | 1316                 | 3.65                                          | 1.94(1.70-2.22)     | 3.32            | 1.81(1.55-2.11)     | 2.87            | 14.33                              |
| African Surinamese origin                     | 1605                 | 3.65                                          | 1.99(1.75-2.27)     | 3.49            | 1.92(1.66-2.23)     | 3.25            | 7.67                               |
| Ghanaian origin                               | 501                  | 1.49                                          | 1.82(1.53-2.17)     | 1.21            | 1.69(1.38-2.08)     | 1.02            | 16.39                              |
| Turkish origin                                | 1578                 | 5.08                                          | 2.54(2.23-2.89)     | 7.25            | 2.22(1.90-2.60)     | 5.84            | 20.00                              |
| Moroccan origin                               | 1557                 | 8.87                                          | 2.78(2.44-3.16)     | 13.64           | 2.37(2.01-2.78)     | 10.84           | 21.28                              |
| <b>Tobacco smoking (explanatory factor)</b>   |                      |                                               |                     |                 |                     |                 |                                    |
| Dutch origin                                  | 2038                 | 43.83                                         | 1.00 (ref)          | ref             | 1.00 (ref)          | ref             | ref                                |
| South Asian Surinamese origin                 | 1316                 | 3.65                                          | 1.94(1.70-2.22)     | 3.32            | 1.92(1.65-2.24)     | 3.25            | 2.99                               |
| African Surinamese origin                     | 1605                 | 3.65                                          | 1.99(1.75-2.27)     | 3.49            | 1.99(1.72-2.30)     | 3.49            | 0.00                               |
| Ghanaian origin                               | 501                  | 1.49                                          | 1.82(1.53-2.17)     | 1.21            | 1.78(1.40-2.10)     | 1.16            | 4.13                               |
| Turkish origin                                | 1578                 | 5.08                                          | 2.54(2.23-2.89)     | 7.25            | 2.55(2.22-2.94)     | 7.30            | 0.00                               |
| Moroccan origin                               | 1557                 | 8.87                                          | 2.78(2.44-3.16)     | 13.64           | 2.67(2.33-3.08)     | 12.91           | 6.25                               |
| <b>Physical activity (explanatory factor)</b> |                      |                                               |                     |                 |                     |                 |                                    |
| Dutch origin                                  | 2038                 | 43.83                                         | 1.00 (ref)          | ref             | 1.00 (ref)          | ref             | ref                                |
| South Asian Surinamese origin                 | 1316                 | 3.65                                          | 1.94(1.70-2.22)     | 3.32            | 1.91(1.65-2.23)     | 3.21            | 4.18                               |
| African Surinamese origin                     | 1605                 | 3.65                                          | 1.99(1.75-2.27)     | 3.49            | 1.98(1.72-2.29)     | 3.45            | 1.99                               |
| Ghanaian origin                               | 501                  | 1.49                                          | 1.82(1.53-2.17)     | 1.21            | 1.81(1.48-2.21)     | 1.19            | 2.46                               |
| Turkish origin                                | 1578                 | 5.08                                          | 2.54(2.23-2.89)     | 7.25            | 2.51(2.19-2.89)     | 7.12            | 2.47                               |
| Moroccan origin                               | 1557                 | 8.87                                          | 2.78(2.44-3.16)     | 13.64           | 2.76(2.40-3.17)     | 13.51           | 1.89                               |
| <b>Fruit intake (explanatory factor)</b>      |                      |                                               |                     |                 |                     |                 |                                    |
| Dutch origin                                  | 2038                 | 43.83                                         | 1.00 (ref)          | ref             | 1.00 (ref)          | ref             | ref                                |
| South Asian Surinamese origin                 | 1316                 | 3.65                                          | 1.94(1.70-2.22)     | 3.32            | 1.95(1.62-2.28)     | 3.35            | 0.00                               |
| African Surinamese origin                     | 1605                 | 3.65                                          | 1.99(1.75-2.27)     | 3.49            | 2.04(1.76-2.36)     | 3.66            | 3.98                               |
| Ghanaian origin                               | 501                  | 1.49                                          | 1.82(1.53-2.17)     | 1.21            | 1.87(1.52-2.29)     | 1.28            | 4.92                               |

|                 |      |      |                 |       |                 |       |      |
|-----------------|------|------|-----------------|-------|-----------------|-------|------|
| Turkish origin  | 1578 | 5.08 | 2.54(2.23-2.89) | 7.25  | 2.60(2.26-3.00) | 7.52  | 3.01 |
| Moroccan origin | 1557 | 8.87 | 2.78(2.44-3.16) | 13.64 | 2.86(2.49-3.29) | 14.17 | 2.90 |

**Actual population prevalence in Amsterdam:** obtained from Statistics Netherlands as of 01 January 2021

**PR=** Prevalence ratio obtained from Poisson regression models with robust errors. Outcome variable = proportion with a SARS-CoV-2 positive PCR test (yes or not)

**PAF=**population attributable fraction calculated from actual prevalence in Amsterdam and prevalence ratios. Confidence intervals for the PAFs were not calculated because we used the actual/precise population figures of Amsterdam (as opposed to estimated prevalence which bear some uncertainty) *Mansournia MA, Altman DG. Population attributable fraction. BMJ 2018 Feb 22;360.*

**Model 1:** adjusted for age + sex.

**Model 2:** Model 1 + explanatory factor (alcohol intake + tobacco smoking + physical activity + fruit intake per week)

**Appendix 4.** Associations between migration background and SARS-CoV-2 positive PCR test, adjusted for intra-pandemic risk aggravating activities.

| Variable                                                                           | Number per group (N) | Actual population prevalence in Amsterdam (%) | Model 1 PR (95% CI) | Model 1 PAF (%) | Model 2 PR (95% CI) | Model 2 PAF (%) | % Change in PAFs from Model 1 to 2 |
|------------------------------------------------------------------------------------|----------------------|-----------------------------------------------|---------------------|-----------------|---------------------|-----------------|------------------------------------|
| <b>Went for grocery shopping (explanatory factor)</b>                              |                      |                                               |                     |                 |                     |                 |                                    |
| Dutch origin                                                                       | 206                  | 43.83                                         | 1.00 (ref)          | ref             | 1.00 (ref)          | ref             | ref                                |
| South Asian Surinamese origin                                                      | 151                  | 3.65                                          | 1.24(1.05-1.48)     | 0.87            | 1.26(1.05-1.49)     | 0.94            | 8.05                               |
| African Surinamese origin                                                          | 119                  | 3.65                                          | 1.22(1.01-1.46)     | 0.80            | 1.22(1.01-1.46)     | 0.80            | 0.00                               |
| Ghanaian origin                                                                    | 38                   | 1.49                                          | 0.92(0.66-1.24)     | NA              | 0.92(0.66-1.26)     | NA              | NA                                 |
| Turkish origin                                                                     | 102                  | 5.08                                          | 1.33(1.10-1.61)     | 1.65            | 1.34(1.10-1.62)     | 1.70            | 3.03                               |
| Moroccan origin                                                                    | 98                   | 8.87                                          | 1.43(1.18-1.73)     | 3.68            | 1.43(1.18-1.72)     | 3.59            | 2.45                               |
| <b>Visited family or friends (explanatory factor)</b>                              |                      |                                               |                     |                 |                     |                 |                                    |
| Dutch origin                                                                       | 206                  | 43.83                                         | 1.00 (ref)          | ref             | 1.00 (ref)          | ref             | ref                                |
| South Asian Surinamese origin                                                      | 151                  | 3.65                                          | 1.24(1.05-1.48)     | 0.87            | 1.23(1.02-1.46)     | 0.83            | 4.60                               |
| African Surinamese origin                                                          | 119                  | 3.65                                          | 1.22(1.01-1.46)     | 0.80            | 1.19(0.98-1.44)     | 0.74            | 6.25                               |
| Ghanaian origin                                                                    | 38                   | 1.49                                          | 0.92(0.66-1.24)     | NA              | 0.88(0.64-1.21)     | NA              | NA                                 |
| Turkish origin                                                                     | 102                  | 5.08                                          | 1.33(1.10-1.61)     | 1.65            | 1.32(1.09-1.60)     | 1.60            | 3.03                               |
| Moroccan origin                                                                    | 98                   | 8.87                                          | 1.43(1.18-1.73)     | 3.68            | 1.42(1.17-1.71)     | 3.59            | 2.45                               |
| <b>Walked the dog or to played outside with your children (explanatory factor)</b> |                      |                                               |                     |                 |                     |                 |                                    |
| Dutch origin                                                                       | 206                  | 43.83                                         | 1.00 (ref)          | ref             | 1.00 (ref)          | ref             | ref                                |
| South Asian Surinamese origin                                                      | 151                  | 3.65                                          | 1.24(1.05-1.48)     | 0.87            | 1.25(1.05-1.50)     | 0.90            | 3.45                               |
| African Surinamese origin                                                          | 119                  | 3.65                                          | 1.22(1.01-1.46)     | 0.80            | 1.22(1.01-1.47)     | 0.80            | 0.00                               |
| Ghanaian origin                                                                    | 38                   | 1.49                                          | 0.92(0.66-1.24)     | NA              | 0.92(0.67-1.25)     | NA              | NA                                 |
| Turkish origin                                                                     | 102                  | 5.08                                          | 1.33(1.10-1.61)     | 1.65            | 1.33(1.10-1.62)     | 1.65            | 0.00                               |
| Moroccan origin                                                                    | 98                   | 8.87                                          | 1.43(1.18-1.73)     | 3.68            | 1.43(1.18-1.73)     | 3.68            | 0.00                               |
| <b>Went outside to get some fresh air or exercise (explanatory factor)</b>         |                      |                                               |                     |                 |                     |                 |                                    |
| Dutch origin                                                                       | 206                  | 43.83                                         | 1.00 (ref)          | ref             | 1.00 (ref)          | ref             | ref                                |
| South Asian Surinamese origin                                                      | 151                  | 3.65                                          | 1.24(1.05-1.48)     | 0.87            | 1.23(1.03-1.46)     | 0.83            | 4.60                               |
| African Surinamese origin                                                          | 119                  | 3.65                                          | 1.22(1.01-1.46)     | 0.80            | 1.18(0.98-1.44)     | 0.75            | 8.75                               |
| Ghanaian origin                                                                    | 38                   | 1.49                                          | 0.92(0.66-1.24)     | NA              | 0.89(0.64-1.21)     | NA              | NA                                 |

|                                                                                              |     |       |                 |      |                 |      |      |
|----------------------------------------------------------------------------------------------|-----|-------|-----------------|------|-----------------|------|------|
| Turkish origin                                                                               | 102 | 5.08  | 1.33(1.10-1.61) | 1.65 | 1.32(1.09-1.61) | 1.60 | 3.03 |
| Moroccan origin                                                                              | 98  | 8.87  | 1.43(1.18-1.73) | 3.68 | 1.41(1.16-1.70) | 3.51 | 4.62 |
| Went outside to take care of someone, such as informal care or shopping (explanatory factor) |     |       |                 |      |                 |      |      |
| Dutch origin                                                                                 | 206 | 43.83 | 1.00 (ref)      | ref  | 1.00 (ref)      | ref  | ref  |
| South Asian Surinamese origin                                                                | 151 | 3.65  | 1.24(1.05-1.48) | 0.87 | 1.26(1.05-1.49) | 0.94 | 8.05 |
| African Surinamese origin                                                                    | 119 | 3.65  | 1.22(1.01-1.46) | 0.80 | 1.22(1.01-1.47) | 0.80 | 0.00 |
| Ghanaian origin                                                                              | 38  | 1.49  | 0.92(0.66-1.24) | NA   | 0.98(0.67-1.25) | NA   | NA   |
| Turkish origin                                                                               | 102 | 5.08  | 1.33(1.10-1.61) | 1.65 | 1.34(1.11-1.65) | 1.70 | 3.03 |
| Moroccan origin                                                                              | 98  | 8.87  | 1.43(1.18-1.73) | 3.68 | 1.42(1.17-1.72) | 3.59 | 2.45 |
| Went to pick up your medication or to visit the doctor (explanatory factor)                  |     |       |                 |      |                 |      |      |
| Dutch origin                                                                                 | 206 | 43.83 | 1.00 (ref)      | ref  | 1.00 (ref)      | ref  | ref  |
| South Asian Surinamese origin                                                                | 151 | 3.65  | 1.24(1.05-1.48) | 0.87 | 1.25(1.05-1.49) | 0.90 | 3.45 |
| African Surinamese origin                                                                    | 119 | 3.65  | 1.22(1.01-1.46) | 0.80 | 1.22(1.01-1.47) | 0.80 | 0.00 |
| Ghanaian origin                                                                              | 38  | 1.49  | 0.92(0.66-1.24) | NA   | 0.92(0.67-1.25) | NA   | 0.00 |
| Turkish origin                                                                               | 102 | 5.08  | 1.33(1.10-1.61) | 1.65 | 1.33(1.10-1.63) | 1.65 | 0.00 |
| Moroccan origin                                                                              | 98  | 8.87  | 1.43(1.18-1.73) | 3.68 | 1.43(1.18-1.73) | 3.68 | 0.00 |
| Visited the church/mosque/place of worship (explanatory factor)                              |     |       |                 |      |                 |      |      |
| Dutch origin                                                                                 | 206 | 43.83 | 1.00 (ref)      | ref  | 1.00 (ref)      | ref  | ref  |
| South Asian Surinamese origin                                                                | 151 | 3.65  | 1.24(1.05-1.48) | 0.87 | 1.24(1.04-1.48) | 0.87 | 0.00 |
| African Surinamese origin                                                                    | 119 | 3.65  | 1.22(1.01-1.46) | 0.80 | 1.21(0.99-1.46) | 0.76 | 5.00 |
| Ghanaian origin                                                                              | 38  | 1.49  | 0.92(0.66-1.24) | NA   | 0.89(0.64-1.21) | NA   | NA   |
| Turkish origin                                                                               | 102 | 5.08  | 1.33(1.10-1.61) | 1.65 | 1.31(1.08-1.60) | 1.55 | 6.06 |
| Moroccan origin                                                                              | 98  | 8.87  | 1.43(1.18-1.73) | 3.68 | 1.41(1.17-1.71) | 3.51 | 4.62 |
| Visited the cinema, theatre, concert, or museum (explanatory factor)                         |     |       |                 |      |                 |      |      |
| Dutch origin                                                                                 | 206 | 43.83 | 1.00 (ref)      | ref  | 1.00 (ref)      | ref  | ref  |
| South Asian Surinamese origin                                                                | 151 | 3.65  | 1.24(1.05-1.48) | 0.87 | 1.24(1.04-1.49) | 0.87 | 0.00 |
| African Surinamese origin                                                                    | 119 | 3.65  | 1.22(1.01-1.46) | 0.80 | 1.21(0.99-1.46) | 0.76 | 5.00 |
| Ghanaian origin                                                                              | 38  | 1.49  | 0.92(0.66-1.24) | NA   | 0.91(0.66-1.24) | NA   | NA   |
| Turkish origin                                                                               | 102 | 5.08  | 1.33(1.10-1.61) | 1.65 | 1.33(1.09-1.61) | 1.65 | 0.00 |
| Moroccan origin                                                                              | 98  | 8.87  | 1.43(1.18-1.73) | 3.68 | 1.42(1.17-1.72) | 3.59 | 2.45 |
| Visited a catering facility e.g., bar/restaurant (explanatory factor)                        |     |       |                 |      |                 |      |      |
| Dutch origin                                                                                 | 206 | 43.83 | 1.00 (ref)      | ref  | 1.00 (ref)      | ref  | ref  |

|                                                                                   |     |       |                 |      |                 |      |      |
|-----------------------------------------------------------------------------------|-----|-------|-----------------|------|-----------------|------|------|
| South Asian Surinamese origin                                                     | 151 | 3.65  | 1.24(1.05-1.48) | 0.87 | 1.25(1.05-1.49) | 0.90 | 3.45 |
| African Surinamese origin                                                         | 119 | 3.65  | 1.22(1.01-1.46) | 0.80 | 1.21(1.01-1.46) | 0.76 | 5.00 |
| Ghanaian origin                                                                   | 38  | 1.49  | 0.92(0.66-1.24) | NA   | 0.92(0.66-1.24) | NA   | NA   |
| Turkish origin                                                                    | 102 | 5.08  | 1.33(1.10-1.61) | 1.65 | 1.33(1.10-1.62) | 1.65 | 0.00 |
| Moroccan origin                                                                   | 98  | 8.87  | 1.43(1.18-1.73) | 3.68 | 1.42(1.18-1.72) | 3.59 | 2.45 |
| Exercised indoors e.g., visited a sports club/gym (explanatory factor)            |     |       |                 |      |                 |      |      |
| Dutch origin                                                                      | 206 | 43.83 | 1.00 (ref)      | ref  | 1.00 (ref)      | ref  | ref  |
| South Asian Surinamese origin                                                     | 151 | 3.65  | 1.24(1.05-1.48) | 0.87 | 1.26(1.06-1.51) | 0.94 | 8.05 |
| African Surinamese origin                                                         | 119 | 3.65  | 1.22(1.01-1.46) | 0.80 | 1.22(1.01-1.48) | 0.80 | 0.00 |
| Ghanaian origin                                                                   | 38  | 1.49  | 0.92(0.66-1.24) | NA   | 0.93(0.67-1.27) | NA   | NA   |
| Turkish origin                                                                    | 102 | 5.08  | 1.33(1.10-1.61) | 1.65 | 1.37(1.13-1.67) | 1.74 | 5.45 |
| Moroccan origin                                                                   | 98  | 8.87  | 1.43(1.18-1.73) | 3.68 | 1.44(1.19-1.74) | 3.76 | 2.17 |
| Visited a recreational area e.g., forest, beach, or campsite (explanatory factor) |     |       |                 |      |                 |      |      |
| Dutch origin                                                                      | 206 | 43.83 | 1.00 (ref)      | ref  | 1.00 (ref)      | ref  | ref  |
| South Asian Surinamese origin                                                     | 151 | 3.65  | 1.24(1.05-1.48) | 0.87 | 1.23(1.03-1.47) | 0.83 | 4.60 |
| African Surinamese origin                                                         | 119 | 3.65  | 1.22(1.01-1.46) | 0.80 | 1.18(0.97-1.43) | 0.75 | 6.25 |
| Ghanaian origin                                                                   | 38  | 1.49  | 0.92(0.66-1.24) | NA   | 0.89(0.65-1.21) | NA   | NA   |
| Turkish origin                                                                    | 102 | 5.08  | 1.33(1.10-1.61) | 1.65 | 1.30(1.06-1.58) | 1.50 | 9.09 |
| Moroccan origin                                                                   | 98  | 8.87  | 1.43(1.18-1.73) | 3.68 | 1.40(1.16-1.69) | 3.43 | 6.79 |
| Went outside for any other reason (explanatory factor)                            |     |       |                 |      |                 |      |      |
| Dutch origin                                                                      | 206 | 43.83 | 1.00 (ref)      | ref  | 1.00 (ref)      | ref  | ref  |
| South Asian Surinamese origin                                                     | 151 | 3.65  | 1.24(1.05-1.48) | 0.87 | 1.25(1.05-1.49) | 0.90 | 3.45 |
| African Surinamese origin                                                         | 119 | 3.65  | 1.22(1.01-1.46) | 0.80 | 1.22(1.01-1.46) | 0.80 | 0.00 |
| Ghanaian origin                                                                   | 38  | 1.49  | 0.92(0.66-1.24) | NA   | 0.91(0.66-1.25) | NA   | NA   |
| Turkish origin                                                                    | 102 | 5.08  | 1.33(1.10-1.61) | 1.65 | 1.34(1.10-1.62) | 1.70 | 3.03 |
| Moroccan origin                                                                   | 98  | 8.87  | 1.43(1.18-1.73) | 3.68 | 1.43(1.18-1.73) | 3.68 | 0.00 |
| Used public transport (explanatory factor)                                        |     |       |                 |      |                 |      |      |
| Dutch origin                                                                      | 206 | 43.83 | 1.00 (ref)      | ref  | 1.00 (ref)      | ref  | ref  |
| South Asian Surinamese origin                                                     | 151 | 3.65  | 1.24(1.05-1.48) | 0.87 | 1.25(1.05-1.48) | 0.90 | 3.45 |
| African Surinamese origin                                                         | 119 | 3.65  | 1.22(1.01-1.46) | 0.80 | 1.22(1.01-1.46) | 0.80 | 0.00 |
| Ghanaian origin                                                                   | 38  | 1.49  | 0.92(0.66-1.24) | NA   | 0.92(0.66-1.25) | NA   | NA   |
| Turkish origin                                                                    | 102 | 5.08  | 1.33(1.10-1.61) | 1.65 | 1.34(1.10-1.62) | 1.70 | 3.03 |



|                                                |     |       |                 |      |                 |      |      |
|------------------------------------------------|-----|-------|-----------------|------|-----------------|------|------|
| Moroccan origin                                | 98  | 8.87  | 1.43(1.18-1.73) | 3.68 | 1.43(1.18-1.73) | 3.68 | 0.00 |
| Received visitors at home (explanatory factor) |     |       |                 |      |                 |      |      |
| Dutch origin                                   | 206 | 43.83 | 1.00 (ref)      | ref  | 1.00 (ref)      | ref  | ref  |
| South Asian Surinamese origin                  | 151 | 3.65  | 1.24(1.05-1.48) | 0.87 | 1.25(1.05-1.48) | 0.90 | 3.45 |
| African Surinamese origin                      | 119 | 3.65  | 1.22(1.01-1.46) | 0.80 | 1.23(1.02-1.48) | 0.83 | 0.00 |
| Ghanaian origin                                | 38  | 1.49  | 0.92(0.66-1.24) | NA   | 0.93(0.67-1.26) | NA   | NA   |
| Turkish origin                                 | 102 | 5.08  | 1.33(1.10-1.61) | 1.65 | 1.33(1.09-1.61) | 1.70 | 3.03 |
| Moroccan origin                                | 98  | 8.87  | 1.43(1.18-1.73) | 3.68 | 1.44(1.19-1.74) | 3.76 | 0.00 |
| Went to work (explanatory factor)              |     |       |                 |      |                 |      |      |
| Dutch origin                                   | 206 | 43.83 | 1.00 (ref)      | ref  | 1.00 (ref)      | ref  | ref  |
| South Asian Surinamese origin                  | 151 | 3.65  | 1.24(1.05-1.48) | 0.87 | 1.24(1.05-1.48) | 0.87 | 0.00 |
| African Surinamese origin                      | 119 | 3.65  | 1.22(1.01-1.46) | 0.80 | 1.21(1.01-1.47) | 0.76 | 5.00 |
| Ghanaian origin                                | 38  | 1.49  | 0.92(0.66-1.24) | NA   | 0.92(0.66-1.25) | NA   | NA   |
| Turkish origin                                 | 102 | 5.08  | 1.33(1.10-1.61) | 1.65 | 1.34(1.10-1.62) | 1.70 | 3.03 |
| Moroccan origin                                | 98  | 8.87  | 1.43(1.18-1.73) | 3.68 | 1.43(1.18-1.73) | 3.68 | 0.00 |

Analysis conducted in a subgroup of participants who participated in the COVID-19 serological study (n=714). The HELIUS COVID-19 serological sub-study data used for current analyses was collected from November 23, 2020, to March 31, 2021 (during the second wave of coronavirus pandemic in the Netherlands)

**Actual population prevalence in Amsterdam:** obtained from Statistics Netherlands as of 01 January 2021

**PR=** Prevalence ratio obtained directly from Poisson regression models with robust standard errors. Outcome variables = proportion with a SARS-CoV-2 positive PCR test (yes or no)

**PAF=**population attributable fraction calculated from actual prevalence in Amsterdam and prevalence ratios. Confidence intervals for the PAFs were not calculated because we used the actual/precise population figures of Amsterdam (as opposed to estimated prevalence which bear some uncertainty) *Mansournia MA, Altman DG. Population attributable fraction. BMJ 2018 Feb 22;360.*

**NA** =not applicable. Only applied when PAFs were only calculated when PR was greater than one.

**Model 1:** adjusted for age + sex.

**Model 2:** Model 1 + each explanatory factor separately (Went for grocery shopping , or Visited family or friends or Walked the dog, or to played outside with your children, or Went outside to get some fresh air, or exercise or Went outside to take care of someone, such as informal care or shopping, or Went to pick up your medication or to visit the doctor, or Visited the church/mosque/place of worship, or Visited the cinema, theatre, concert or museum or Visited a catering facility (bar/restaurant) or Exercised indoors (e.g. visited a sports club/gym) or Visited a recreational area (e.g. forest, beach or campsite), or Went outside for any other reason or Used public transport ,or Received visitors at home or Went to work).

**Appendix 5.** Associations between migration background and SARS-CoV-2 positive PCR test, adjusted for mitigating activities during the coronavirus pandemic.

| Variable                                                                                 | Number per group (N) | Actual population prevalence in Amsterdam (%) | Model 1 PR (95% CI) | Model 1 PAF (%) | Model 2 PR (95% CI) | Model 2 PAF (%) | % Change in PAFs from Model 1 to 2 |
|------------------------------------------------------------------------------------------|----------------------|-----------------------------------------------|---------------------|-----------------|---------------------|-----------------|------------------------------------|
| Easiness to regularly wash hands for 20 seconds with soap and water (explanatory factor) |                      |                                               |                     |                 |                     |                 |                                    |
| Dutch origin                                                                             | 253                  | 43.83                                         | 1.00 (ref)          | ref             | 1.00 (ref)          | ref             | ref                                |
| South Asian Surinamese origin                                                            | 73                   | 3.65                                          | 1.14(1.01-1.42)     | 0.51            | 1.15(0.92-1.43)     | 0.54            | 5.88                               |
| African Surinamese origin                                                                | 95                   | 3.65                                          | 1.38(1.20-1.89)     | 1.37            | 1.36(1.12-1.64)     | 1.30            | 5.11                               |
| Ghanaian origin                                                                          | 12                   | 1.49                                          | Excluded            | Excluded        | Excluded            | Excluded        | Excluded                           |
| Turkish origin                                                                           | 60                   | 5.08                                          | 1.50(1.20-1.89)     | 2.48            | 1.49(1.18-1.89)     | 2.43            | 2.02                               |
| Moroccan origin                                                                          | 60                   | 8.87                                          | 1.49(1.18-1.88)     | 4.17            | 1.47(1.15-1.86)     | 4.00            | 4.08                               |
| Easiness to always cough or sneeze into your elbow (explanatory factor)                  |                      |                                               |                     |                 |                     |                 |                                    |
| Dutch origin                                                                             | 253                  | 43.83                                         | 1.00 (ref)          | ref             | 1.00 (ref)          | ref             | ref                                |
| South Asian Surinamese origin                                                            | 73                   | 3.65                                          | 1.14(1.01-1.42)     | 0.51            | 1.18(1.12-1.65)     | 0.55            | 7.84                               |
| African Surinamese origin                                                                | 95                   | 3.65                                          | 1.38(1.20-1.89)     | 1.37            | 1.37(1.18-1.88)     | 1.33            | 2.92                               |
| Ghanaian origin                                                                          | 12                   | 1.49                                          | Excluded            | Excluded        | Excluded            | Excluded        | Excluded                           |
| Turkish origin                                                                           | 60                   | 5.08                                          | 1.50(1.20-1.89)     | 2.48            | 1.49(1.18-1.88)     | 2.43            | 2.02                               |
| Moroccan origin                                                                          | 60                   | 8.87                                          | 1.49(1.18-1.88)     | 4.17            | 1.49(1.16-1.88)     | 4.17            | 0.00                               |
| Easiness to always use a paper tissue to wipe or blow your nose (explanatory factor)     |                      |                                               |                     |                 |                     |                 |                                    |
| Dutch origin                                                                             | 253                  | 43.83                                         | 1.00 (ref)          | ref             | 1.00 (ref)          | ref             | ref                                |
| South Asian Surinamese origin                                                            | 73                   | 3.65                                          | 1.14(1.01-1.42)     | 0.51            | 1.15(0.92-1.43)     | 0.54            | 5.88                               |
| African Surinamese origin                                                                | 95                   | 3.65                                          | 1.38(1.20-1.89)     | 1.37            | 1.34(1.11-1.63)     | 1.25            | 8.76                               |
| Ghanaian origin                                                                          | 12                   | 1.49                                          | Excluded            | Excluded        | Excluded            | Excluded        | Excluded                           |
| Turkish origin                                                                           | 60                   | 5.08                                          | 1.50(1.20-1.89)     | 2.48            | 1.48(1.17-1.86)     | 2.38            | 4.03                               |
| Moroccan origin                                                                          | 60                   | 8.87                                          | 1.49(1.18-1.88)     | 4.17            | 1.45(1.14-1.85)     | 3.84            | 7.91                               |
| Easiness to stay at home as much as possible (explanatory factor)                        |                      |                                               |                     |                 |                     |                 |                                    |
| Dutch origin                                                                             | 253                  | 43.83                                         | 1.00 (ref)          | ref             | 1.00 (ref)          | ref             | ref                                |
| South Asian Surinamese origin                                                            | 73                   | 3.65                                          | 1.14(1.01-1.42)     | 0.51            | 1.15(0.91-1.42)     | 0.54            | 5.88                               |
| African Surinamese origin                                                                | 95                   | 3.65                                          | 1.38(1.20-1.89)     | 1.37            | 1.35(1.11-1.63)     | 1.26            | 8.03                               |
| Ghanaian origin                                                                          | 12                   | 1.49                                          | Excluded            | Excluded        | Excluded            | Excluded        | Excluded                           |

|                                                                                           |     |       |                 |          |                 |          |          |
|-------------------------------------------------------------------------------------------|-----|-------|-----------------|----------|-----------------|----------|----------|
| Turkish origin                                                                            | 60  | 5.08  | 1.50(1.20-1.89) | 2.48     | 1.50(1.18-1.89) | 2.48     | 0.00     |
| Moroccan origin                                                                           | 60  | 8.87  | 1.49(1.18-1.88) | 4.17     | 1.47(1.15-1.87) | 4.00     | 4.08     |
| Easiness for you to always stay 1.5 meters away from other people (explanatory factor)    |     |       |                 |          |                 |          |          |
| Dutch origin                                                                              | 253 | 43.83 | 1.00 (ref)      | ref      | 1.00 (ref)      | ref      | ref      |
| South Asian Surinamese origin                                                             | 73  | 3.65  | 1.14(1.01-1.42) | 0.51     | 1.15(0.92-1.43) | 0.54     | 5.88     |
| African Surinamese origin                                                                 | 95  | 3.65  | 1.38(1.20-1.89) | 1.37     | 1.36(1.11-1.64) | 1.30     | 5.11     |
| Ghanaian origin                                                                           | 12  | 1.49  | Excluded        | Excluded | Excluded        | Excluded | Excluded |
| Turkish origin                                                                            | 60  | 5.08  | 1.50(1.20-1.89) | 2.48     | 1.50(1.18-1.89) | 2.48     | 0.00     |
| Moroccan origin                                                                           | 60  | 8.87  | 1.49(1.18-1.88) | 4.17     | 1.47(1.15-1.87) | 4.00     | 4.08     |
| Easiness for you to not visit people whose health is already at risk (explanatory factor) |     |       |                 |          |                 |          |          |
| Dutch origin                                                                              | 253 | 43.83 | 1.00 (ref)      | ref      | 1.00 (ref)      | ref      | ref      |
| South Asian Surinamese origin                                                             | 73  | 3.65  | 1.14(1.01-1.42) | 0.51     | 1.16(0.93-1.45) | 0.56     | 9.80     |
| African Surinamese origin                                                                 | 95  | 3.65  | 1.38(1.20-1.89) | 1.37     | 1.39(1.14-1.69) | 1.40     | 2.19     |
| Ghanaian origin                                                                           | 12  | 1.49  | Excluded        | Excluded | Excluded        | Excluded | Excluded |
| Turkish origin                                                                            | 60  | 5.08  | 1.50(1.20-1.89) | 2.48     | 1.52(1.21-1.92) | 2.57     | 3.63     |
| Moroccan origin                                                                           | 60  | 8.87  | 1.49(1.18-1.88) | 4.17     | 1.47(1.15-1.87) | 4.00     | 4.08     |
| Easiness for you to not shake hands (explanatory factor)                                  |     |       |                 |          |                 |          |          |
| Dutch origin                                                                              | 253 | 43.83 | 1.00 (ref)      | ref      | 1.00 (ref)      | ref      | ref      |
| South Asian Surinamese origin                                                             | 73  | 3.65  | 1.14(1.01-1.42) | 0.51     | 1.15(0.92-1.43) | 0.54     | 5.88     |
| African Surinamese origin                                                                 | 95  | 3.65  | 1.38(1.20-1.89) | 1.37     | 1.36(1.13-1.64) | 1.30     | 5.11     |
| Ghanaian origin                                                                           | 12  | 1.49  | Excluded        | Excluded | Excluded        | Excluded | Excluded |
| Turkish origin                                                                            | 60  | 5.08  | 1.50(1.20-1.89) | 2.48     | 1.51(1.19-1.89) | 2.53     | 2.02     |
| Moroccan origin                                                                           | 60  | 8.87  | 1.49(1.18-1.88) | 4.17     | 1.47(1.15-1.87) | 4.00     | 4.08     |
| Easiness for you to wear a face mask in public spaces (explanatory factor)                |     |       |                 |          |                 |          |          |
| Dutch origin                                                                              | 253 | 43.83 | 1.00 (ref)      | ref      | 1.00 (ref)      | ref      | ref      |
| South Asian Surinamese origin                                                             | 73  | 3.65  | 1.14(1.01-1.42) | 0.51     | 1.15(0.92-1.43) | 0.55     | 7.84     |
| African Surinamese origin                                                                 | 95  | 3.65  | 1.38(1.20-1.89) | 1.37     | 1.36(1.13-1.65) | 1.31     | 4.38     |
| Ghanaian origin                                                                           | 12  | 1.49  | Excluded        | Excluded | Excluded        | Excluded | Excluded |
| Turkish origin                                                                            | 60  | 5.08  | 1.50(1.20-1.89) | 2.48     | 1.51(1.19-1.90) | 2.52     | 1.61     |
| Moroccan origin                                                                           | 60  | 8.87  | 1.49(1.18-1.88) | 4.17     | 1.46(1.15-1.86) | 3.93     | 5.76     |

Analysis conducted in a subset group of participants who responded to the online questionnaire about performing COVID-19 mitigating activities during

the coronavirus pandemic. The HELIUS COVID-19 online sub-study data used for current analyses was collected from 27 August 2020 to 29 September 2020 (After the first wave of coronavirus pandemic in the Netherlands) Ghanaians excluded due to low numbers.

**Actual population prevalence in Amsterdam:** obtained from Statistics Netherlands as of 01 January 2021.

**PR=** Prevalence ratio obtained from Poisson regression models with robust standard errors. Outcome variables = proportion with a SARS-CoV-2 positive PCR test (yes or not).

**PAF=**Population attributable fraction calculated from actual prevalence in Amsterdam and prevalence ratios. Confidence intervals for the PAFs were not calculated because we used the actual/precise population figures of Amsterdam (as opposed to estimated prevalence which bear some uncertainty) *Mansournia MA, Altman DG. Population attributable fraction. BMJ 2018 Feb 22;360.*

**Model 1:** adjusted for age + sex.

**Model 2:** Model 1 + each explanatory factor separately (Easiness to regularly wash hands for 20 seconds with soap and water, or Easiness to always cough or sneeze into your elbow (instead of into your hand or in the air) , or Easiness to always use a paper tissue to wipe or blow your nose (instead of your sleeve or your hand, or a cotton handkerchief), or Easiness to stay at home as much as possible, or Easiness for you to always stay 1.5 metres away from other people (except within your family/household) , or Easiness for you to not visit people whose health is already at risk, or Easiness for you to not shake hands, or Easiness for you to wear a face mask in public spaces)

**Appendix 6.** Baseline characteristics of participants in the total HELIUS population

| Variable name                               | Categories                           | Total<br>N=21902 | %    | Dutch<br>origin<br>N=4500 | %    | South Asian<br>Surinamese<br>origin<br>N=2996 | %    | African<br>Surinamese<br>origin<br>N=4082 | %    | Ghanaian<br>origin<br>N=2310 | %    | Turkish<br>origin<br>N=3585 | %    | Moroccan<br>origin<br>N=3889 | %    |
|---------------------------------------------|--------------------------------------|------------------|------|---------------------------|------|-----------------------------------------------|------|-------------------------------------------|------|------------------------------|------|-----------------------------|------|------------------------------|------|
| <b>Sex</b>                                  | Females                              | 12710            | 58.0 | 2451                      | 54.5 | 1658                                          | 55.3 | 2505                                      | 61.4 | 1422                         | 61.6 | 1973                        | 55.0 | 2383                         | 61.3 |
|                                             | Males                                | 9192             | 42.0 | 2049                      | 45.5 | 1338                                          | 44.7 | 1577                                      | 38.6 | 888                          | 38.4 | 1612                        | 45.0 | 1506                         | 38.7 |
| <b>Age in years (as of 1 February 2021)</b> | Mean age (SD)                        | 51.2             | 13.3 | 52.9                      | 14.1 | 52.6                                          | 13.5 | 54.9                                      | 12.6 | 52.0                         | 11.3 | 47.1                        | 12.2 | 47.0                         | 12.9 |
|                                             | 24-29 years                          | 1583             | 7.2  | 221                       | 4.9  | 185                                           | 6.2  | 166                                       | 4.1  | 141                          | 6.1  | 396                         | 11.0 | 448                          | 11.5 |
|                                             | 30-34 years                          | 1759             | 8.0  | 398                       | 8.8  | 247                                           | 8.2  | 224                                       | 5.5  | 106                          | 4.6  | 330                         | 9.2  | 421                          | 10.8 |
|                                             | 35-39 years                          | 1959             | 8.9  | 469                       | 10.4 | 247                                           | 8.2  | 271                                       | 6.6  | 120                          | 5.2  | 381                         | 10.6 | 439                          | 11.3 |
|                                             | 40-44 years                          | 1947             | 8.9  | 396                       | 8.8  | 194                                           | 6.5  | 274                                       | 6.7  | 199                          | 8.6  | 388                         | 10.8 | 460                          | 11.8 |
|                                             | 45-49 years                          | 2272             | 10.4 | 399                       | 8.9  | 274                                           | 9.1  | 336                                       | 8.2  | 291                          | 12.6 | 467                         | 13.0 | 466                          | 12.0 |
|                                             | 50-54 years                          | 2767             | 12.6 | 450                       | 10.0 | 392                                           | 13.1 | 466                                       | 11.4 | 366                          | 15.8 | 548                         | 15.3 | 484                          | 12.4 |
|                                             | 55-59 years                          | 3232             | 14.8 | 524                       | 11.6 | 442                                           | 14.8 | 692                                       | 17.0 | 464                          | 20.1 | 549                         | 15.3 | 462                          | 11.9 |
|                                             | 60-64 years                          | 2833             | 12.9 | 521                       | 11.6 | 416                                           | 13.9 | 718                                       | 17.6 | 403                          | 17.4 | 325                         | 9.1  | 341                          | 8.8  |
|                                             | 65-69 years                          | 1979             | 9.0  | 509                       | 11.3 | 333                                           | 11.1 | 558                                       | 13.7 | 176                          | 7.6  | 119                         | 3.3  | 225                          | 5.8  |
|                                             | 70-74 years                          | 1268             | 5.8  | 511                       | 11.4 | 195                                           | 6.5  | 300                                       | 7.3  | 38                           | 1.6  | 65                          | 1.8  | 116                          | 3.0  |
|                                             | 75-79 years                          | 303              | 1.4  | 102                       | 2.3  | 71                                            | 2.4  | 77                                        | 1.9  | 6                            | 0.3  | 17                          | 0.5  | 27                           | 0.7  |
| <b>Education</b>                            | No school/Low education              | 3819             | 17.4 | 146                       | 3.2  | 426                                           | 14.2 | 225                                       | 5.5  | 649                          | 28.1 | 1119                        | 31.2 | 1197                         | 30.8 |
|                                             | Lower secondary education            | 5703             | 26.0 | 629                       | 14.0 | 991                                           | 33.1 | 1443                                      | 35.4 | 905                          | 39.2 | 880                         | 24.5 | 689                          | 17.7 |
|                                             | Upper secondary education            | 6376             | 29.1 | 981                       | 21.8 | 878                                           | 29.3 | 1451                                      | 35.5 | 575                          | 24.9 | 1017                        | 28.4 | 1290                         | 33.2 |
|                                             | Tertiary/higher vocational education | 5803             | 26.5 | 2722                      | 60.5 | 685                                           | 22.9 | 929                                       | 22.8 | 140                          | 6.1  | 531                         | 14.8 | 675                          | 17.4 |
| <b>Occupation</b>                           | Elementary Occupation                | 2918             | 13.3 | 76                        | 1.7  | 283                                           | 9.4  | 261                                       | 6.4  | 1235                         | 53.5 | 530                         | 14.8 | 499                          | 12.8 |
|                                             | Lower occupation                     | 5563             | 25.4 | 642                       | 14.3 | 913                                           | 30.5 | 1300                                      | 31.8 | 456                          | 19.7 | 1098                        | 30.6 | 975                          | 25.1 |
|                                             | Medium occupation                    | 4933             | 22.5 | 982                       | 21.8 | 828                                           | 27.6 | 1313                                      | 32.2 | 172                          | 7.4  | 663                         | 18.5 | 811                          | 20.9 |
|                                             | Higher occupation                    | 3707             | 16.9 | 1637                      | 36.4 | 475                                           | 15.9 | 713                                       | 17.5 | 57                           | 2.5  | 292                         | 8.1  | 437                          | 11.2 |
|                                             | Scientific occupation                | 1374             | 6.3  | 893                       | 19.8 | 136                                           | 4.5  | 106                                       | 2.6  | 20                           | 0.9  | 109                         | 3.0  | 87                           | 2.2  |
| <b>Migration generation</b>                 | 1st generation                       | 13529            | 61.8 | NA                        | NA   | 2284                                          | 76.2 | 3402                                      | 83.3 | 2202                         | 95.3 | 2518                        | 70.2 | 2663                         | 68.5 |
|                                             | 2nd generation                       | 3873             | 17.7 | NA                        | NA   | 712                                           | 23.8 | 680                                       | 16.7 | 108                          | 4.7  | 1067                        | 29.8 | 1226                         | 31.5 |
|                                             | No migration history                 | 4500             | 20.5 | 4500                      | 100  | NA                                            | NA   | NA                                        | NA   | NA                           | NA   | NA                          | NA   | NA                           | NA   |
| <b>Health literacy</b>                      | Health literacy adequate             | 18644            | 85.1 | 4467                      | 99.3 | 2772                                          | 92.5 | 3964                                      | 97.1 | 1490                         | 64.5 | 2544                        | 71.0 | 2899                         | 74.5 |
|                                             | Health literacy not adequate         | 3154             | 14.4 | 31                        | 0.7  | 211                                           | 7.0  | 109                                       | 2.7  | 795                          | 34.4 | 1016                        | 28.3 | 965                          | 24.8 |
| <b>Household size</b>                       | 1 person household                   | 4473             | 20.4 | 1240                      | 27.6 | 691                                           | 23.1 | 1301                                      | 31.9 | 342                          | 14.8 | 351                         | 9.8  | 407                          | 10.5 |
|                                             | 2-person household                   | 5268             | 24.1 | 1815                      | 40.3 | 716                                           | 23.9 | 1030                                      | 25.2 | 476                          | 20.6 | 576                         | 16.1 | 507                          | 13.0 |
|                                             | 3-person household                   | 4055             | 18.5 | 680                       | 15.1 | 641                                           | 21.4 | 783                                       | 19.2 | 537                          | 23.2 | 730                         | 20.4 | 593                          | 15.2 |
|                                             | 4-person household                   | 4127             | 18.8 | 581                       | 12.9 | 574                                           | 19.2 | 567                                       | 13.9 | 520                          | 22.5 | 992                         | 27.7 | 788                          | 20.3 |
|                                             | 5-person household +                 | 3687             | 16.8 | 166                       | 3.7  | 340                                           | 11.3 | 328                                       | 8.0  | 370                          | 16.0 | 896                         | 25.0 | 1545                         | 39.7 |

|                                                 |                                                 |       |      |      |      |      |      |      |      |      |      |      |      |      |      |
|-------------------------------------------------|-------------------------------------------------|-------|------|------|------|------|------|------|------|------|------|------|------|------|------|
| <b>Underlying health conditions<sup>1</sup></b> | Underlying health conditions on medication      | 2598  | 11.9 | 498  | 11.1 | 494  | 16.5 | 601  | 14.7 | 256  | 11.1 | 386  | 10.8 | 294  | 7.6  |
|                                                 | Underlying health conditions not on medications | 9936  | 45.4 | 1384 | 30.8 | 1376 | 45.9 | 2088 | 51.2 | 1376 | 59.6 | 1735 | 48.4 | 1735 | 44.6 |
|                                                 | No underlying health conditions                 | 9368  | 42.8 | 2618 | 58.2 | 1126 | 37.6 | 1393 | 34.1 | 678  | 29.4 | 1464 | 40.8 | 1860 | 47.8 |
| <b>Physical activity<sup>2</sup></b>            | Met recommendations                             | 12508 | 56.4 | 3446 | 75.5 | 1622 | 53.3 | 2532 | 61.0 | 1244 | 53.2 | 1507 | 41.7 | 1823 | 46.7 |
|                                                 | Did not meet recommendation                     | 9626  | 43.4 | 1114 | 24.4 | 1414 | 46.5 | 1615 | 38.9 | 1094 | 46.8 | 2100 | 58.1 | 2076 | 53.1 |
| <b>Smoking</b>                                  | Current                                         | 5302  | 23.9 | 1129 | 24.7 | 861  | 28.3 | 1309 | 31.5 | 104  | 4.4  | 1240 | 34.3 | 525  | 13.4 |
|                                                 | Never                                           | 12334 | 55.6 | 1689 | 37.0 | 1757 | 57.8 | 2016 | 48.6 | 2027 | 86.7 | 1700 | 47.0 | 2874 | 73.6 |
|                                                 | Past                                            | 4421  | 19.9 | 1737 | 38.1 | 413  | 13.6 | 805  | 19.4 | 191  | 8.2  | 648  | 17.9 | 492  | 12.6 |
| <b>Alcohol consumption</b>                      | Yes                                             | 11221 | 50.6 | 4151 | 91.0 | 1708 | 56.1 | 2826 | 68.1 | 1101 | 47.1 | 813  | 22.5 | 286  | 7.3  |
|                                                 | No                                              | 10816 | 48.8 | 407  | 8.9  | 1322 | 43.5 | 1294 | 31.2 | 1214 | 51.9 | 2772 | 76.7 | 3603 | 92.2 |
| <b>Fruit intake per week</b>                    | mean (SD)                                       | 6.36  | 2.4  | 6.88 | 2.2  | 6.38 | 2.4  | 6.19 | 2.5  | 5.53 | 2.5  | 6.47 | 2.4  | 6.31 | 2.42 |

<sup>1</sup> Meeting the PA goal was defined as at least 30 min/day of moderate- to high- intensity PA 5 days/week

<sup>2</sup> Underlying health conditions includes one or more of hypertension, diabetes, obesity, kidney disease, asthma, and metabolic syndrome which were available for use in our study

Appendix 7. Baseline characteristics of participants in the HELIUS COVID-19 seroprevalence sub-study.

| Variable name                             | Categories                                      | Total <sup>1</sup><br>N=714 | %    | Dutch<br>origin<br>N=206 | %    | South Asian<br>Surinamese<br>origin<br>N=151 | %    | African<br>Surinamese<br>origin<br>N=119 | %    | Ghanaian<br>origin<br>N=38 | %    | Turkish<br>origin<br>N=102 | %    | Moroccan<br>origin<br>N=98 | %    |
|-------------------------------------------|-------------------------------------------------|-----------------------------|------|--------------------------|------|----------------------------------------------|------|------------------------------------------|------|----------------------------|------|----------------------------|------|----------------------------|------|
| Sex                                       | Females                                         | 414                         | 58.0 | 111                      | 53.9 | 98                                           | 64.9 | 77                                       | 64.7 | 15                         | 39.5 | 56                         | 54.9 | 57                         | 58.2 |
|                                           | Males                                           | 300                         | 42.0 | 95                       | 46.1 | 53                                           | 35.1 | 42                                       | 35.3 | 23                         | 60.5 | 46                         | 45.1 | 41                         | 41.8 |
| Age in years (as of 1 February 2021)      | Mean age (SD)                                   | 52.5                        | 12.3 | 53.1                     | 13.8 | 55.2                                         | 10.6 | 57.5                                     | 11.3 | 54.0                       | 9.9  | 46.5                       | 10.5 | 46.3                       | 10.8 |
|                                           | 24-29 years                                     | 36                          | 5.0  | 12                       | 5.8  | 3                                            | 2.0  | 2                                        | 1.7  | 1                          | 2.6  | 9                          | 8.8  | 9                          | 9.2  |
|                                           | 30-34 years                                     | 41                          | 5.7  | 13                       | 6.3  | 8                                            | 5.3  | 5                                        | 4.2  | 0                          | 0.0  | 8                          | 7.8  | 7                          | 7.1  |
|                                           | 35-39 years                                     | 58                          | 8.1  | 25                       | 12.1 | 6                                            | 4.0  | 3                                        | 2.5  | 3                          | 7.9  | 8                          | 7.8  | 13                         | 13.3 |
|                                           | 40-44 years                                     | 68                          | 9.5  | 14                       | 6.8  | 8                                            | 5.3  | 7                                        | 5.9  | 4                          | 10.5 | 17                         | 16.7 | 18                         | 18.4 |
|                                           | 45-49 years                                     | 77                          | 10.8 | 15                       | 7.3  | 11                                           | 7.3  | 15                                       | 12.6 | 3                          | 7.9  | 20                         | 19.6 | 13                         | 13.3 |
|                                           | 50-54 years                                     | 99                          | 13.9 | 23                       | 11.2 | 30                                           | 19.9 | 7                                        | 5.9  | 6                          | 15.8 | 20                         | 19.6 | 13                         | 13.3 |
|                                           | 55-59 years                                     | 115                         | 16.1 | 29                       | 14.1 | 31                                           | 20.5 | 22                                       | 18.5 | 10                         | 26.3 | 10                         | 9.8  | 13                         | 13.3 |
|                                           | 60-64 years                                     | 107                         | 15.0 | 28                       | 13.6 | 30                                           | 19.9 | 26                                       | 21.8 | 8                          | 21.1 | 7                          | 6.9  | 8                          | 8.2  |
|                                           | 65-69 years                                     | 69                          | 9.7  | 26                       | 12.6 | 16                                           | 10.6 | 19                                       | 16.0 | 3                          | 7.9  | 1                          | 1.0  | 4                          | 4.1  |
| 70-74 years                               | 33                                              | 4.6                         | 16   | 7.8                      | 7    | 4.6                                          | 8    | 6.7                                      | 0    | 0.0                        | 2    | 2.0                        | 0    | 0.0                        |      |
| 75-79 years                               | 11                                              | 1.5                         | 5    | 2.4                      | 1    | 0.7                                          | 5    | 4.2                                      | 0    | 0.0                        | 0    | 0.0                        | 0    | 0.0                        |      |
| Education                                 | No school/Low education                         | 53                          | 7.4  | 2                        | 1.0  | 16                                           | 10.6 | 2                                        | 1.7  | 5                          | 13.2 | 13                         | 12.7 | 15                         | 15.3 |
|                                           | Lower secondary education                       | 155                         | 21.7 | 19                       | 9.2  | 50                                           | 33.1 | 35                                       | 29.4 | 16                         | 42.1 | 21                         | 20.6 | 14                         | 14.3 |
|                                           | Upper secondary education                       | 208                         | 29.1 | 40                       | 19.4 | 45                                           | 29.8 | 41                                       | 34.5 | 11                         | 28.9 | 36                         | 35.3 | 35                         | 35.7 |
|                                           | Tertiary/higher vocational education            | 297                         | 41.6 | 145                      | 70.4 | 40                                           | 26.5 | 41                                       | 34.5 | 6                          | 15.8 | 31                         | 30.4 | 34                         | 34.7 |
| Occupation                                | Elementary Occupation                           | 55                          | 7.7  | 1                        | 0.5  | 14                                           | 9.3  | 8                                        | 6.7  | 12                         | 31.6 | 13                         | 12.7 | 7                          | 7.1  |
|                                           | Lower occupation                                | 140                         | 19.6 | 21                       | 10.2 | 41                                           | 27.2 | 26                                       | 21.8 | 13                         | 34.2 | 17                         | 16.7 | 22                         | 22.4 |
|                                           | Medium occupation                               | 178                         | 24.9 | 41                       | 19.9 | 43                                           | 28.5 | 40                                       | 33.6 | 3                          | 7.9  | 27                         | 26.5 | 24                         | 24.5 |
|                                           | Higher occupation                               | 183                         | 25.6 | 81                       | 39.3 | 31                                           | 20.5 | 29                                       | 24.4 | 4                          | 10.5 | 14                         | 13.7 | 24                         | 24.5 |
|                                           | Scientific occupation                           | 80                          | 11.2 | 48                       | 23.3 | 7                                            | 4.6  | 6                                        | 5.0  | 3                          | 7.9  | 11                         | 10.8 | 5                          | 5.1  |
| Migration generation                      | 1st generation                                  | 410                         | 57.4 | NA                       | NA   | 128                                          | 84.8 | 103                                      | 86.6 | 37                         | 97.4 | 72                         | 70.6 | 70                         | 71.4 |
|                                           | 2nd generation                                  | 98                          | 13.7 | NA                       | NA   | 23                                           | 15.2 | 16                                       | 13.4 | 1                          | 2.6  | 30                         | 29.4 | 28                         | 28.6 |
|                                           | No migration history                            | 206                         | 28.9 | 206                      | 100  | NA                                           | NA   | NA                                       | NA   | NA                         | NA   | NA                         | NA   | NA                         | NA   |
| Health literacy                           | Health literacy adequate                        | 673                         | 94.3 | 205                      | 99.5 | 149                                          | 98.7 | 115                                      | 96.6 | 30                         | 78.9 | 86                         | 84.3 | 88                         | 89.8 |
|                                           | Health literacy not adequate                    | 39                          | 5.5  | 1                        | 0.5  | 2                                            | 1.3  | 4                                        | 3.4  | 8                          | 21.1 | 14                         | 13.7 | 10                         | 10.2 |
| Household size                            | 1 person household                              | 149                         | 20.9 | 56                       | 27.2 | 25                                           | 16.6 | 36                                       | 30.3 | 8                          | 21.1 | 10                         | 9.8  | 14                         | 14.3 |
|                                           | 2-person household                              | 191                         | 26.8 | 75                       | 36.4 | 47                                           | 31.1 | 28                                       | 23.5 | 10                         | 26.3 | 14                         | 13.7 | 17                         | 17.3 |
|                                           | 3-person household                              | 136                         | 19.0 | 28                       | 13.6 | 39                                           | 25.8 | 29                                       | 24.4 | 7                          | 18.4 | 23                         | 22.5 | 10                         | 10.2 |
|                                           | 4-person household                              | 146                         | 20.4 | 40                       | 19.4 | 28                                           | 18.5 | 20                                       | 16.8 | 5                          | 13.2 | 33                         | 32.4 | 20                         | 20.4 |
|                                           | 5-person household +                            | 89                          | 12.5 | 7                        | 3.4  | 12                                           | 7.9  | 5                                        | 4.2  | 7                          | 18.4 | 21                         | 20.6 | 37                         | 37.8 |
| Underlying health conditions <sup>2</sup> | Underlying health conditions on medication      | 80                          | 11.2 | 17                       | 8.3  | 21                                           | 13.9 | 21                                       | 17.6 | 5                          | 13.2 | 9                          | 8.8  | 7                          | 7.1  |
|                                           | Underlying health conditions not on medications | 304                         | 42.6 | 70                       | 34.0 | 74                                           | 49.0 | 61                                       | 51.3 | 22                         | 57.9 | 40                         | 39.2 | 37                         | 37.8 |
|                                           | No underlying health conditions                 | 330                         | 46.2 | 119                      | 57.8 | 56                                           | 37.1 | 37                                       | 31.1 | 11                         | 28.9 | 53                         | 52.0 | 54                         | 55.1 |
| SARS-CoV-2 PCR result                     | COVID-19 PCR positive                           | 187                         | 26.2 | 28                       | 13.6 | 44                                           | 29.1 | 32                                       | 26.9 | 3                          | 7.9  | 46                         | 45.1 | 34                         | 34.7 |
|                                           | COVID-19 PCR negative                           | 527                         | 73.8 | 178                      | 86.4 | 107                                          | 70.9 | 87                                       | 73.1 | 35                         | 92.1 | 56                         | 54.9 | 64                         | 65.3 |

<sup>1</sup>The HELIUS COVID-19 seroprevalence study used for this study was collected from November 23, 2020, to March 31, 2021 (during the second wave of coronavirus pandemic in the Netherlands)

<sup>2</sup> Underlying health conditions include one or more of hypertension, diabetes, obesity, kidney disease, asthma, and metabolic syndrome which were available for use in our study.

Appendix 8. Baseline characteristics of participants in the HELIUS COVID-19 online sub-study.

| Variable name                             | Categories                                      | Total <sup>1</sup><br>N=553 | %    | Dutch<br>origin<br>N=253 | %     | South Asian<br>Surinamese<br>origin<br>N=73 | %    | African<br>Surinamese<br>origin<br>N=95 | %    | Ghanaian<br>origin<br>N=12 | %     | Turkish<br>origin<br>N=60 | %    | Moroccan<br>origin<br>N=60 | %    |
|-------------------------------------------|-------------------------------------------------|-----------------------------|------|--------------------------|-------|---------------------------------------------|------|-----------------------------------------|------|----------------------------|-------|---------------------------|------|----------------------------|------|
| Sex                                       | Females                                         | 318                         | 57.5 | 153                      | 60.5  | 45                                          | 61.6 | 62                                      | 65.3 | 5                          | 41.7  | 30                        | 50.0 | 23                         | 38.3 |
|                                           | Males                                           | 235                         | 42.5 | 100                      | 39.5  | 28                                          | 38.4 | 33                                      | 34.7 | 7                          | 58.3  | 30                        | 50.0 | 37                         | 61.7 |
| Age in years (as of 1 February 2021)      | Mean age (SD)                                   | 52.1                        | 12.7 | 54.4                     | 13.2  | 50.7                                        | 10.9 | 57.0                                    | 9.5  | 53.2                       | 10.1  | 43.5                      | 10.3 | 44.9                       | 12.4 |
|                                           | 24-29 years                                     | 25                          | 4.5  | 10                       | 4.0   | 2                                           | 2.7  | 0                                       | 0.0  | 0                          | 0.0   | 8                         | 13.3 | 5                          | 8.3  |
|                                           | 30-34 years                                     | 37                          | 6.7  | 17                       | 6.7   | 6                                           | 8.2  | 3                                       | 3.2  | 0                          | 0.0   | 2                         | 3.3  | 9                          | 15.0 |
|                                           | 35-39 years                                     | 54                          | 9.8  | 20                       | 7.9   | 7                                           | 9.6  | 3                                       | 3.2  | 2                          | 16.7  | 11                        | 18.3 | 11                         | 18.3 |
|                                           | 40-44 years                                     | 60                          | 10.8 | 20                       | 7.9   | 9                                           | 12.3 | 6                                       | 6.3  | 2                          | 16.7  | 14                        | 23.3 | 9                          | 15.0 |
|                                           | 45-49 years                                     | 49                          | 8.9  | 23                       | 9.1   | 5                                           | 6.8  | 7                                       | 7.4  | 1                          | 8.3   | 7                         | 11.7 | 6                          | 10.0 |
|                                           | 50-54 years                                     | 70                          | 12.7 | 25                       | 9.9   | 16                                          | 21.9 | 12                                      | 12.6 | 0                          | 0.0   | 10                        | 16.7 | 7                          | 11.7 |
|                                           | 55-59 years                                     | 83                          | 15.0 | 35                       | 13.8  | 12                                          | 16.4 | 25                                      | 26.3 | 3                          | 25.0  | 3                         | 5.0  | 5                          | 8.3  |
|                                           | 60-64 years                                     | 80                          | 14.5 | 43                       | 17.0  | 11                                          | 15.1 | 17                                      | 17.9 | 2                          | 16.7  | 5                         | 8.3  | 2                          | 3.3  |
|                                           | 65-69 years                                     | 56                          | 10.1 | 30                       | 11.9  | 4                                           | 5.5  | 16                                      | 16.8 | 2                          | 16.7  | 0                         | 0.0  | 4                          | 6.7  |
| 70-74 years                               | 35                                              | 6.3                         | 27   | 10.7                     | 1     | 1.4                                         | 6    | 6.3                                     | 0    | 0.0                        | 0     | 0.0                       | 1    | 1.7                        |      |
| 75-79 years                               | 4                                               | 0.7                         | 3    | 1.2                      | 0     | 0.0                                         | 0    | 0.0                                     | 0    | 0.0                        | 0     | 0.0                       | 1    | 1.7                        |      |
| Education                                 | No school/Low education                         | 21                          | 3.8  | 5                        | 2.0   | 2                                           | 2.7  | 1                                       | 1.1  | 2                          | 16.7  | 6                         | 10.0 | 5                          | 8.3  |
|                                           | Lower secondary education                       | 103                         | 18.6 | 29                       | 11.5  | 21                                          | 28.8 | 24                                      | 25.3 | 4                          | 33.3  | 12                        | 20.0 | 13                         | 21.7 |
|                                           | Upper secondary education                       | 171                         | 30.9 | 55                       | 21.7  | 27                                          | 37.0 | 37                                      | 38.9 | 5                          | 41.7  | 25                        | 41.7 | 22                         | 36.7 |
|                                           | Tertiary/higher vocational education            | 258                         | 46.7 | 164                      | 64.8  | 23                                          | 31.5 | 33                                      | 34.7 | 1                          | 8.3   | 17                        | 28.3 | 20                         | 33.3 |
| Occupation                                | Elementary Occupation                           | 21                          | 3.8  | 3                        | 1.2   | 3                                           | 4.1  | 2                                       | 2.1  | 5                          | 41.7  | 7                         | 11.7 | 1                          | 1.7  |
|                                           | Lower occupation                                | 105                         | 19.0 | 30                       | 11.9  | 15                                          | 20.5 | 24                                      | 25.3 | 4                          | 33.3  | 16                        | 26.7 | 16                         | 26.7 |
|                                           | Medium occupation                               | 148                         | 26.8 | 53                       | 20.9  | 26                                          | 35.6 | 33                                      | 34.7 | 2                          | 16.7  | 16                        | 26.7 | 18                         | 30.0 |
|                                           | Higher occupation                               | 176                         | 31.8 | 111                      | 43.9  | 16                                          | 21.9 | 25                                      | 26.3 | 0                          | 0.0   | 10                        | 16.7 | 14                         | 23.3 |
|                                           | Scientific occupation                           | 70                          | 12.7 | 50                       | 19.8  | 6                                           | 8.2  | 5                                       | 5.3  | 0                          | 0.0   | 7                         | 11.7 | 2                          | 3.3  |
| Migration generation                      | 1st generation                                  | 215                         | 38.9 | NA                       | NA    | 55                                          | 75.3 | 82                                      | 86.3 | 12                         | 100.0 | 34                        | 56.7 | 32                         | 53.3 |
|                                           | 2nd generation                                  | 85                          | 15.4 | NA                       | NA    | 18                                          | 24.7 | 13                                      | 13.7 | 0                          | 0.0   | 26                        | 43.3 | 28                         | 46.7 |
|                                           | No migration history                            | 253                         | 45.7 | 253                      | 100   | NA                                          | NA   | NA                                      | NA   | NA                         | NA    | NA                        | NA   | NA                         | NA   |
| Health literacy                           | Health literacy adequate                        | 538                         | 97.3 | 253                      | 100.0 | 72                                          | 98.6 | 93                                      | 97.9 | 9                          | 75.0  | 56                        | 93.3 | 55                         | 91.7 |
|                                           | Health literacy not adequate                    | 15                          | 2.7  | 0                        | 0.0   | 1                                           | 1.4  | 2                                       | 2.1  | 3                          | 25.0  | 4                         | 6.7  | 5                          | 8.3  |
| Household size                            | 1 person household                              | 114                         | 20.6 | 65                       | 25.7  | 11                                          | 15.1 | 28                                      | 29.5 | 3                          | 25.0  | 0                         | 0.0  | 7                          | 11.7 |
|                                           | 2-person household                              | 149                         | 26.9 | 88                       | 34.8  | 18                                          | 24.7 | 24                                      | 25.3 | 3                          | 25.0  | 6                         | 10.0 | 10                         | 16.7 |
|                                           | 3-person household                              | 109                         | 19.7 | 41                       | 16.2  | 24                                          | 32.9 | 24                                      | 25.3 | 0                          | 0.0   | 13                        | 21.7 | 7                          | 11.7 |
|                                           | 4-person household                              | 111                         | 20.1 | 49                       | 19.4  | 16                                          | 21.9 | 13                                      | 13.7 | 3                          | 25.0  | 23                        | 38.3 | 7                          | 11.7 |
|                                           | 5-person household +                            | 69                          | 12.5 | 10                       | 4.0   | 4                                           | 5.5  | 5                                       | 5.3  | 3                          | 25.0  | 18                        | 30.0 | 29                         | 48.3 |
| Acculturation                             | Integrated                                      | 253                         | 45.8 | NA                       | NA    | 60                                          | 82.2 | 91                                      | 95.8 | 12                         | 100.0 | 44                        | 73.3 | 46                         | 76.7 |
|                                           | Assimilated                                     | 11                          | 2.0  | NA                       | NA    | 6                                           | 8.2  | 1                                       | 1.1  | 0                          | 0.0   | 2                         | 3.3  | 2                          | 3.3  |
|                                           | Separated                                       | 28                          | 5.1  | NA                       | NA    | 6                                           | 8.2  | 3                                       | 3.2  | 0                          | 0.0   | 12                        | 20.0 | 7                          | 11.7 |
|                                           | Marginalized                                    | 7                           | 1.3  | NA                       | NA    | 1                                           | 1.4  | 0                                       | 0.0  | 0                          | 0.0   | 2                         | 3.3  | 4                          | 6.7  |
| Underlying health conditions <sup>1</sup> | Underlying health conditions on medication      | 68                          | 12.3 | 25                       | 9.9   | 13                                          | 17.8 | 21                                      | 22.1 | 2                          | 16.7  | 4                         | 6.7  | 3                          | 5.0  |
|                                           | Underlying health conditions not on medications | 201                         | 36.3 | 70                       | 27.7  | 27                                          | 37.0 | 45                                      | 47.4 | 8                          | 66.7  | 24                        | 40.0 | 27                         | 45.0 |
|                                           | No underlying health conditions                 | 284                         | 51.4 | 158                      | 62.5  | 33                                          | 45.2 | 29                                      | 30.5 | 2                          | 16.7  | 32                        | 53.3 | 30                         | 50.0 |
| SARS-CoV-2 PCR result                     | COVID-19 PCR positive                           | 135                         | 24.4 | 34                       | 13.4  | 18                                          | 24.7 | 32                                      | 33.7 | 4                          | 33.3  | 22                        | 36.7 | 25                         | 41.7 |
|                                           | COVID-19 PCR negative                           | 418                         | 75.6 | 219                      | 86.6  | 55                                          | 75.3 | 63                                      | 66.3 | 8                          | 66.7  | 38                        | 63.3 | 35                         | 58.3 |

<sup>1</sup>The HELIUS COVID-19 online sub-study used for this study was collected from 27 August 2020 and 29 September 2020 (after the second wave of coronavirus pandemic in the Netherlands)

<sup>2</sup>Underlying health conditions includes one or more of hypertension, diabetes, obesity, kidney disease, asthma, and metabolic syndrome which were available for use in our study



**Appendix 9. Main analyses on pre-pandemic sociodemographic and medical factors replicated in seroprevalence sub-study:** associations between migration background and SARS-CoV-2 PCR test, adjusted for sociodemographic and medical factors.

| Variable                      | Number per group (N) | Actual population prevalence in Amsterdam (%) | Model 1 PR (95% CI) | Model 1 PAF (%) | Model 2 PR (95% CI) | Model 2 PAF (%) | % Change in PAFs from Model 1 to 2 |
|-------------------------------|----------------------|-----------------------------------------------|---------------------|-----------------|---------------------|-----------------|------------------------------------|
| Dutch origin                  | 206                  | 43.83                                         | 1.00 (ref)          | ref             | 1.00(ref)           | ref             | ref                                |
| South Asian Surinamese origin | 151                  | 3.65                                          | 1.24(1.05-1.48)     | 0.87            | 1.13(0.92-1.37)     | 0.47            | 45.98                              |
| African Surinamese origin     | 119                  | 3.65                                          | 1.22(1.01-1.46)     | 0.80            | 1.17(0.95-1.44)     | 0.62            | 22.50                              |
| Ghanaian origin               | 38                   | 1.49                                          | 0.92(0.66-1.24)     | NA              | 0.80(0.56-1.11)     | NA              | NA                                 |
| Turkish origin                | 102                  | 5.08                                          | 1.33(1.10-1.61)     | 1.65            | 1.13(0.89-1.42)     | 0.66            | 60.00                              |
| Moroccan origin               | 98                   | 8.87                                          | 1.43(1.18-1.73)     | 3.68            | 1.20(0.95-1.51)     | 1.74            | 52.72                              |

Poisson regression models performed in the main study group (8595) were repeated in the COVID-19 serological sub-study participants (n=714) to assess the validity of using sub-studies. The HELIUS COVID-19 serological sub-study data used for current analyses was collected from November 23, 2020, to March 31, 2021 (during the second wave of coronavirus pandemic in the Netherlands)

**Actual population prevalence in Amsterdam:** obtained from Statistics Netherlands as of 01 January 2021

**PR=** Prevalence ratio obtained from Poisson regression models with robust standard errors. Outcome variables = proportion with a SARS-CoV-2 positive PCR test (yes or not).

**PAF=**Population attributable fraction calculated from actual prevalence in Amsterdam and prevalence ratios. Confidence intervals for the PAFs were not calculated because we used the actual/precise population figures of Amsterdam (as opposed to estimated prevalence which bear some uncertainty) *Mansournia MA, Altman DG. Population attributable fraction. BMJ 2018 Feb 22;360.*

**Model 1:** adjusted for age + sex.

**Model 2:** Model 1 + Pre-pandemic socio-demographic and medical factors (education + occupation + household size + healthy literacy + history of underlying health conditions.)

**Appendix 10. Main analyses on pre-pandemic sociodemographic and medical factors replicated in online sub-study:** associations between migration background and SARS-CoV-2 positive PCR test, adjusted for pre-pandemic sociodemographic and medical factors.

| Variable                      | Number per group (N) | Actual population prevalence in Amsterdam (%) | Model 1 PR (95% CI) | Model 1 PAF (%) | Model 2 PR (95% CI) | Model 2 PAF (%) | % Change in PAFs from Model 1 to 2 |
|-------------------------------|----------------------|-----------------------------------------------|---------------------|-----------------|---------------------|-----------------|------------------------------------|
| Dutch origin                  | 253                  | 43.83                                         | 1.00 (ref)          | ref             | 1.00(ref)           | ref             | ref                                |
| South Asian Surinamese origin | 95                   | 3.65                                          | 1.14(1.01-1.42)     | 0.51            | 1.17(0.91-1.47)     | 0.62            | 17.74                              |
| African Surinamese origin     | 73                   | 3.65                                          | 1.38(1.20-1.89)     | 1.37            | 1.37(1.11-1.67)     | 1.33            | 3.01                               |
| Ghanaian origin               | 12                   | 1.49                                          | Excluded            | Excluded        | Excluded            | Excluded        | Excluded                           |
| Turkish origin                | 60                   | 5.08                                          | 1.50(1.20-1.89)     | 2.48            | 1.61(1.24-2.08)     | 3.01            | 17.61                              |
| Moroccan origin               | 60                   | 8.87                                          | 1.49(1.18-1.88)     | 4.17            | 1.62 (1.23-2.12)    | 5.21            | 19.96                              |

Poisson regression models performed in the main study group (8595) were repeated in this COVID-19 online sub-study participants (n=553) to assess validity of using the online sub-study.

Ghanaians excluded due to low numbers. The HELIUS COVID-19 online sub-study data used for current analyses was collected from 27 August 2020 to 29 September 2020 (after the first wave of coronavirus pandemic in the Netherlands)

**Actual population prevalence in Amsterdam:** obtained from Statistics Netherlands as of 01 January 2021

**PR=** Prevalence ratio obtained from Poisson regression models with robust standard errors. Outcome variables = proportion with a SARS-CoV-2 positive PCR test (yes or not).

**PAF=**Population attributable fraction calculated from actual prevalence in Amsterdam and prevalence ratios. Confidence intervals for the PAFs were not calculated because we used the actual/precise population figures of Amsterdam (as opposed to estimated prevalence which bear some uncertainty) *Mansournia MA, Altman DG. Population attributable fraction. BMJ 2018 Feb 22;360.*

**Model 1:** adjusted for age + sex.

**Model 2:** Model 1 + Pre-pandemic socio-demographic and medical factors (education + occupation + household size + healthy literacy + history of underlying health conditions.)

**Appendix 11.** Ratio of positive PCR tests to positive antibody COVID-19 tests at the time of antibody testing in the HELIUS COVID-19 serological study.

| Ethnicity                     | N Per group | Positive PCR test | Positive antibody test | Both PCR test and antibody test positive | Crude ratio of positive tests <sup>1</sup> | Age and sex adjusted ratio of positive tests <sup>1</sup> |
|-------------------------------|-------------|-------------------|------------------------|------------------------------------------|--------------------------------------------|-----------------------------------------------------------|
| Total                         | 638         | 161               | 222                    | 160                                      | 0.73(0.61-0.86)                            | Not applied                                               |
| Dutch origin                  | 179         | 17                | 33                     | 17                                       | 0.52(0.30-0.89)                            | 0.50(0.24-1.06)                                           |
| South Asian Surinamese origin | 115         | 35                | 38                     | 34                                       | 0.92(0.63-1.36)                            | 0.91(0.60-1.37)                                           |
| African Surinamese origin     | 105         | 26                | 33                     | 26                                       | 0.79(0.51-1.23)                            | 0.81(0.52-1.26)                                           |
| Ghanaian origin               | 31          | 10                | 17                     | 10                                       | 0.59(0.32-1.09)                            | 0.58(0.42-0.81)                                           |
| Turkish origin                | 118         | 44                | 55                     | 44                                       | 0.80(0.58-1.10)                            | 0.80(0.58-1.12)                                           |
| Moroccan origin               | 90          | 29                | 46                     | 29                                       | 0.63(0.43-0.92)                            | 0.63(0.44-0.89)                                           |

<sup>1</sup>Ratio is derived as proportion of COVID-19 PCR positive tests divided by proportion of COVID-19 antibody positive tests.

Calculated only for PCR tests that took place before the date of antibody test.

The HELIUS COVID-19 serological sub-study took place between November 23, 2020, and June 4, 2021

**Appendix 12. Sensitivity analysis with SARS-CoV-2 antibody tests:** associations between migration background and SARS-CoV-2 antibody test, adjusted for pre-pandemic factors or intra-pandemic activities.

| Variable                                                                  | Number per group (N) | Actual population prevalence in Amsterdam (%) | Model 1 PR (95% CI) | Model 1 PAF (%) | Model 2 PR (95% CI) | Model 2 PAF (%) | % Change in PAFs from Model 1 to 2 |
|---------------------------------------------------------------------------|----------------------|-----------------------------------------------|---------------------|-----------------|---------------------|-----------------|------------------------------------|
| Pre-pandemic socio-demographic and medical factors (explanatory factors)  |                      |                                               |                     |                 |                     |                 |                                    |
| Dutch origin                                                              | 464                  | 43.83                                         | 1.00 (ref)          | ref             | 1.00(ref)           | ref             | ref                                |
| South Asian Surinamese origin                                             | 391                  | 3.65                                          | 1.60(1.12-2.34)     | 2.14            | 1.41(0.94-2.11)     | 1.44            | 32.71                              |
| African Surinamese origin                                                 | 361                  | 3.65                                          | 1.88(1.32-2.70)     | 3.11            | 1.76(1.19-2.62)     | 2.70            | 13.18                              |
| Ghanaian origin                                                           | 206                  | 1.49                                          | 4.27(3.04-6.09)     | 4.64            | 3.07(1.99-4.75)     | 2.99            | 35.56                              |
| Turkish origin                                                            | 317                  | 5.08                                          | 2.64(1.87-3.78)     | 7.69            | 1.99(1.34-3.01)     | 4.79            | 37.71                              |
| Moroccan origin                                                           | 294                  | 8.87                                          | 2.94(2.09-4.20)     | 14.69           | 2.04(1.36-3.09)     | 8.45            | 42.48                              |
| Pre-pandemic lifestyle factors (explanatory factors)                      |                      |                                               |                     |                 |                     |                 |                                    |
| Dutch origin                                                              | 464                  | 43.83                                         | 1.00 (ref)          | ref             | 1.00(ref)           | ref             | ref                                |
| South Asian Surinamese origin                                             | 391                  | 3.65                                          | 1.60(1.12-2.34)     | 2.14            | 1.52(1.05-2.24)     | 1.86            | 13.08                              |
| African Surinamese origin                                                 | 361                  | 3.65                                          | 1.88(1.32-2.70)     | 3.11            | 1.83(1.27-2.66)     | 2.94            | 5.47                               |
| Ghanaian origin                                                           | 206                  | 1.49                                          | 4.27(3.04-6.09)     | 4.64            | 4.04(2.81-5.88)     | 4.33            | 6.68                               |
| Turkish origin                                                            | 317                  | 5.08                                          | 2.64(1.87-3.78)     | 7.69            | 2.38(1.63-3.51)     | 6.55            | 14.82                              |
| Moroccan origin                                                           | 294                  | 8.87                                          | 2.94(2.09-4.20)     | 14.69           | 2.54(1.71-3.79)     | 12.02           | 18.18                              |
| Intra-pandemic COVID-19 risk aggravating activities (explanatory factors) |                      |                                               |                     |                 |                     |                 |                                    |
| Dutch origin                                                              | 464                  | 43.83                                         | 1.00 (ref)          | ref             | 1.00(ref)           | ref             | ref                                |
| South Asian Surinamese origin                                             | 391                  | 3.65                                          | 1.60(1.12-2.34)     | 2.14            | 1.59(1.09-2.32)     | 2.11            | 1.40                               |
| African Surinamese origin                                                 | 361                  | 3.65                                          | 1.88(1.32-2.70)     | 3.11            | 1.83(1.30-2.73)     | 2.94            | 5.47                               |
| Ghanaian origin                                                           | 206                  | 1.49                                          | 4.27(3.04-6.09)     | 4.64            | 3.86(2.55-5.62)     | 4.20            | 9.48                               |
| Turkish origin                                                            | 317                  | 5.08                                          | 2.64(1.87-3.78)     | 7.69            | 2.49(1.74-3.62)     | 7.04            | 8.45                               |
| Moroccan origin                                                           | 294                  | 8.87                                          | 2.94(2.09-4.20)     | 14.69           | 2.86(2.01-4.12)     | 14.17           | 3.54                               |

Sensitivity analyses with SARS-CoV-2 antibody tests were performed in the HELIUS COVID-19 serological sub-study. The sub-study data used for current analyses was collected from November 23, 2020, to March 31, 2021 (during the second wave of coronavirus pandemic in the Netherlands)

**Actual population prevalence in Amsterdam:** obtained from Statistics Netherlands as of 01 January 2021.

**PR**=Prevalence ratio obtained directly from Poisson regression models with robust standard errors. Outcome variable = proportion with a SARS-CoV-2 positive antibody test (yes or not)

**PAF**=Population attributable fraction calculated from actual prevalence in Amsterdam and prevalence ratios. Confidence intervals for the PAFs were not calculated because we used the actual/precise population figures of Amsterdam (as opposed to estimated prevalence which bear some uncertainty) *Mansournia MA, Altman DG. Population attributable fraction. BMJ 2018 Feb 22;360.*

**Pre-pandemic socio-demographic and medical factors:** Analysis conducted in in the total dataset (n=8595). The data spanned from May 2020 (commencement of mass testing) to September 2021. The factors included in the models were: education + occupation + household size + healthy literacy + history of underlying health conditions

**Pre-pandemic health-related behaviours:** Analysis conducted in in the total dataset (n=8595). The data spanned from May 2020 (commencement of mass testing) to September 2021. The factors included in the models were: alcohol consumption + tobacco smoking + physical activity + fruit intake

**Intra-pandemic COVID-19 risk aggravating activities:** Analysis conducted in a subgroup of participants who participated in the COVID-19 seroprevalence study (n=714). The HELIUS COVID-19 seroprevalence sub-study data used for current analyses was collected from November 23, 2020, to March 31, 2021 (during the second wave of coronavirus pandemic in the Netherlands). The factors included in the models were: Went for grocery shopping + Visited family or friends + Walked the dog or to played outside with your children + Went outside to get some fresh air or exercise + Went outside to take care of someone, such as informal care or shopping + Went to pick up your medication or to visit the doctor + Visited the church/mosque/place of worship + Visited the cinema, theatre, concert or museum + Visited a catering facility (bar/restaurant) + Exercised indoors (e.g. visited a sports club/gym) + Visited a recreational area (e.g. forest, beach or campsite) + Went outside for any other reason + Used public transport + Received visitors at home + Went to work

**Model 1:** adjusted for age + sex

**Model 2:** Model 1 + (pre-pandemic factors or intra-pandemic activities).

**Appendix 13.** Sensitivity analyses after removing participants who were vaccinated against COVID-19 and those with previous COVID-19 infections in the HELIUS COVID-19 serological sub-study.

| Variable                                                               | Number per group (N) | Actual population prevalence in Amsterdam (%) | Model 1 PR (95% CI) | Model 1 PAF (%) | Model 2 PR (95% CI) | Model 2 PAF (%) | % Change in PAFs from Model 1 to 2 |
|------------------------------------------------------------------------|----------------------|-----------------------------------------------|---------------------|-----------------|---------------------|-----------------|------------------------------------|
| Pre-pandemic socio-demographic and medical factors (mediating factors) |                      |                                               |                     |                 |                     |                 |                                    |
| Dutch origin                                                           | 127                  | 43.83                                         | 1.00 (ref)          | ref             | 1.00(ref)           | ref             | ref                                |
| South Asian Surinamese origin                                          | 93                   | 3.65                                          | 1.11(0.89-1.39)     | 0.39            | 1.00(0.78-1.28)     | 0.01            | 38.03                              |
| African Surinamese origin                                              | 85                   | 3.65                                          | 1.13(0.90-1.42)     | 0.49            | 1.06(0.83-1.36)     | 0.24            | 25.21                              |
| Ghanaian origin                                                        | 20                   | 1.49                                          | 0.92(0.59-1.36)     | 0.13            | 0.81(0.49-1.26)     | 0.29            | 16.46                              |
| Turkish origin                                                         | 67                   | 5.08                                          | 1.29(1.02-1.63)     | 1.46            | 1.08(0.81-1.43)     | 0.40            | 106.89                             |
| Moroccan origin                                                        | 72                   | 8.87                                          | 1.34(1.07-1.67)     | 2.90            | 1.05(0.79-1.39)     | 0.44            | 246.00                             |
| Intra-risk aggravating factors (mediating factors)                     |                      |                                               |                     |                 |                     |                 |                                    |
| Dutch origin                                                           | 127                  | 43.83                                         | 1.00 (ref)          | ref             | 1.00(ref)           | ref             | ref                                |
| South Asian Surinamese origin                                          | 93                   | 3.65                                          | 1.11(0.89-1.39)     | 0.39            | 1.10(0.87-1.39)     | 0.36            | 3.03                               |
| African Surinamese origin                                              | 85                   | 3.65                                          | 1.13(0.90-1.42)     | 0.49            | 1.09(0.85-1.38)     | 0.49            | 0.00                               |
| Ghanaian origin                                                        | 20                   | 1.49                                          | 0.92(0.59-1.36)     | 0.13            | 0.91(0.57-1.39)     | 0.13            | 0.03                               |
| Turkish origin                                                         | 67                   | 5.08                                          | 1.29(1.02-1.63)     | 1.46            | 1.28(0.99-1.65)     | 1.46            | 0.00                               |
| Moroccan origin                                                        | 72                   | 8.87                                          | 1.34(1.07-1.67)     | 2.90            | 1.30(1.03-1.65)     | 2.90            | 0.00                               |

The HELIUS COVID-19 seroprevalence sub-study data used for current analyses was collected from November 23, 2020, to March 31, 2021 (during the second wave of coronavirus pandemic in the Netherlands, n=464).

**Actual population prevalence in Amsterdam:** obtained from Statistics Netherlands as of 01 January 2021.

**PR=**Prevalence ratio obtained directly from Poisson regression models with robust standard errors. Outcome variable = proportion with a SARS-CoV-2 positive antibody test (yes or not)

**PAF=**Population attributable fraction calculated from actual prevalence in Amsterdam and prevalence ratios. Confidence intervals for the PAFs were not calculated because we used the actual/precise population figures of Amsterdam (as opposed to estimated prevalence which bear some uncertainty) *Mansournia MA, Altman DG. Population attributable fraction. BMJ 2018 Feb 22;360.*

**Pre-pandemic socio-demographic and medical factors:** Analysis conducted in in the total dataset (n=8595). The data spanned from May 2020 (commencement of mass testing) to September 2021. The factors included in the models were: education + occupation + household size + healthy literacy + history of underlying health conditions.

**Pre-pandemic health-related behaviours:** Analysis conducted in in the total dataset (n=8595). The data spanned from May 2020 (commencement of mass testing) to September 2021. The factors included in the models were: alcohol consumption + tobacco smoking + physical activity + fruit intake.

**Intra-pandemic COVID-19 risk aggravating activities:** The factors included in the models were: Went for grocery shopping + Visited family or friends + Walked the dog or to played outside with your children + Went outside to get some fresh air or exercise + Went outside to take care of someone, such as informal care or shopping + Went to pick up your medication or to visit the doctor + Visited the church/mosque/place of worship + Visited the cinema, theatre, concert or museum + Visited a

catering facility (bar/restaurant) + Exercised indoors (e.g. visited a sports club/gym) + Visited a recreational area (e.g. forest, beach or campsite) + Went outside for any other reason + Used public transport + Received visitors at home + Went to work

**Model 1:** adjusted for age + sex

**Model 2:** Model 1 + (pre-pandemic factors or intra-pandemic activities).
